1

2

3

4

5

6

**Title:**

7

QuickFigures: a tool to quickly transform microscope images into quality figures

8

9

**Short Title:**

10

QuickFigures: a tool to quickly transform microscope images into quality figures

11

12

**Author names and affiliations:**

13

**\*Gregory Mazo**, Memorial Sloan-Kettering Cancer Center, New York, NY 10065, USA.

14

\*Corresponding Author

15           **Abstract:**

16           Publications involving fluorescent microscopy generally contain many panels with split  
17 channels, merged images, scale bars and label text. Assembling and editing these figures with  
18 even spacing, consistent font, text position, accurate scale bars and other features can be tedious  
19 and time consuming. In order to save time and streamline the process I have created a toolset  
20 called [QuickFigures](#).

## 21 **Introduction, Results, Discussion**

22           Microscopy intensive scientific manuscripts often include figures with large numbers of  
23 fluorescent microscope images often split by channel into separate panels. A major publication  
24 can contain over 200 image panels! (1) To create a professional looking publication one must  
25 have consistent format within and between figures. However, commercial softwares do not  
26 provide quick ways to split channels and organize panels to generate figures without scores of  
27 error prone and repetitive mouse drags. Furthermore, major edits to figures like these are  
28 troublesome whether using Adobe Illustrator or Photoshop. For example, cropping or reordering  
29 over a dozen identically sized panels in Photoshop without mistakes or accidental changes in  
30 panel spacing cannot be done conveniently nor quickly. Although some tools for creating and  
31 formatting scientific figures have been created (2,3), we found that these did not suit our needs  
32 because they did not save time on many irksome but important steps. Therefore, I created  
33 QuickFigures, a set of tools that 1) can produce figures of sufficient quality for any journal, 2) is  
34 user friendly and easy to learn, 3) can save hours of time, 4) can export files into popular  
35 softwares like Adobe Illustrator, Microsoft Powerpoint, and Inkscape 5) is versatile enough to  
36 generate any conceivable style, layout, variation or format of figure, 6) is used as a free PlugIn  
37 for ImageJ, making adoption easy for researchers already familiar with ImageJ.

38           I have also created complete video tutorials (See Supplemental Materials, and [link](#)) as a  
39 guide to help first time users. This series of videos also clearly demonstrates the usefulness of  
40 QuickFigures. Below is a description of the figure production process.

41           After installing QuickFigures into ImageJ, new toolbars appear (**Figure 1**, see red  
42 arrows). Users can create a figure simply by first opening a multidimensional image stack in  
43 ImageJ, and then clicking the “Quick Figure” button that is visible on the Object Tools toolbar of  
44 Quickfigures (**Figure 1**, see purple arrow). This one click creates a figure with a series of split

45 channel images, merged image, channel labels and scale bar. The user can edit every part of this  
46 figure. QuickFigures automates and facilitates mundane tasks that arise naturally during the  
47 editing process. Changes in panel spacing or panel order can be quickly applied to figures with  
48 dozens of panels. Insets can be created and edited easily with the Inset Tool (**Figure 1**, see  
49 Orange arrow and Movie S1). When one resizes an image panel, scale bars appropriately adjust.  
50 Text signifying each channel is colored and aligned automatically. Image resolution can be  
51 changed as needed. When a user adjusts the Min/Max of one channel, QuickFigures alters every  
52 image panel that contains that channel (Merge and Split) ensuring consistency of all adjustments  
53 across groups of multichannel images. Importantly, a user can set a default or “template” for  
54 figures to ensure that a single consistent format is automatically applied to newly created figures  
55 (Templates can also be applied to existing figures). In aggregate, several slow, or complex tasks  
56 are made fast and simple.

57 QuickFigures was designed to feel familiar and logical to anyone who has used  
58 Powerpoint, Photoshop, Illustrator or any commercial software. Every item in QuickFigures is an  
59 editable object that can be clicked on, moved, resized, rotated, hidden, deleted, aligned, edited or  
60 duplicated (**Figure 1**, see green arrows). A simplistic set of menus and toolbars allows the user to  
61 add an unlimited number of items such as text, images, drawings, arrows, layers, plots, shapes  
62 and additional multichannel images. Right clicking and double clicking on items reveals popup  
63 menus and options dialogs for the clicked item. With minimal instruction, any researcher can  
64 understand the software and feel comfortable using it. The specialized features of QuickFigures  
65 are designed to require mere minutes explanation while saving time and providing convenience.  
66 After a user has created work in QuickFigures, a single click can generate the same figure in  
67 Adobe Illustrator. QuickFigures can also export files into Powerpoint (.ppt) or Scaleable vector  
68 graphic (.svg), a format that can be opened by many popular softwares including Adobe  
69 Illustrator. Exported figures are then suitable for further editing, presentation or publication.

70

## 71 **Materials and Methods.**

72 QuickFigures was written in Java, the same language as ImageJ. Existing ImageJ code was used  
73 for several key processes including 1) keeping track of an images spatial scale and units, 2) the  
74 assembly of channels into a merged image based on channel colors and display range, 3) scaling  
75 and rotating images (Using the bilinear interpolation algorithm), 4) keeping track of channel  
76 colors, channel order and metadata about channel names, exposure times 5) Serializing/saving  
77 ImageJ's multichannel images. Since several complex processes could be performed using  
78 ImageJ, this eliminated the need to devise and implement new algorithms. However, the  
79 connection between QuickFigures core components and ImageJ was designed with an interface-  
80 based architecture such that ImageJ could be replaced by another package if future needs demand  
81 it. The user interface for QuickFigures was written using java foundation classes and can  
82 function on any operating system (Tested on Window and MacOSX). The QuickFigures package  
83 can also be reused to construct other softwares.

84 **Import and Export:** The best (and most popular) tool for importing proprietary microscopy file  
85 formats into ImageJ is the **Bio-Formats Importer** created by the OME consortium (4) (See  
86 Movie S5 for use instructions and demonstration). This Importer also reads important metadata  
87 regarding spatial scale and channel names/channel colors. Assuming that a .Zvi, .Czi, .Lif or  
88 other microscopy format file is opened using Bio-Formats, QuickFigures will use the metadata as  
89 a basis for the initial channel labels within a figure. In order to test the accuracy of channel  
90 names, a series of example images stained with known markers in known colors was opened;  
91 QuickFigures' channel labels were consistent with the channel names given by Bio-Formats.

92 In order to export figures to '.ppt' and '.svg' file formats, two toolkits created by the  
93 Apache Foundation were used as libraries (POI for Powerpoint, <https://poi.apache.org/> and Batik

94 for SVG, <https://xmlgraphics.apache.org/batik/>). Instructions on how to install these libraries are  
95 included in the tutorial videos (Movie S5). To test the export, I created example figures with all  
96 types of objects including Images, Text, Scale Bars, multiple colors, arrows and other shapes.  
97 Exported figures resembled originals with matching details such as PPI of image panels, fonts,  
98 colors, width of lines etc.

99 **Other Testing.** QuickFigures includes scores of objects, windows, menus, and components.

100 Although most features could be tested simply by using them on multiple example figures, a few  
101 functions of QuickFigures demanded methodical testing. Of these, accuracy of scale bars was the  
102 most crucial feature. Since ImageJ maintains information on the spatial scale of images, that  
103 information is used by QuickFigures's Image panel objects and scale bar objects. To test the  
104 accuracy, appropriate scale bar sizes for several images were first calculated manually and then  
105 compared to the sizes of QuickFigures scale bar objects. Subsequently, ImagePanels were  
106 resized to make sure that the scale bar objects appropriately changed size. Next, the units and  
107 spatial scale of the ImageJ Image was changed to make sure that the scale bar changed  
108 appropriately. In order to test complex features like the figure format menu commands, every  
109 possible type of figure edit was performed on a single figure and that figure's format was saved.  
110 That saved format was then applied to a series of figures to confirm that the details of a saved  
111 figure format was indeed reflected in the target figure.

112 **Practical Use Test:** After creation of an early version, QuickFigures was used constantly for  
113 preparation of figures for presentations for a period 3-5 years. Every format, layout and style of  
114 figure was generated for various scientific projects. During that time any irregularities, error  
115 messages and limitations that appeared were also fixed. Because of this practical testing, one can  
116 be confident that QuickFigures is suitable for widespread use.

117 **Installation:** QuickFigures may be downloaded from [here](#). QuickFigures can be installed into  
118 ImageJ simply by placing file into plugins folder of ImageJ. (see Movie S5)

119 **Acknowledgements:** We acknowledge Professor Bryan Tsou. Images used for the  
120 demonstration videos and testing were taken using the microscopes within the Tsou Lab. We  
121 also acknowledge Dr. Brian O'Rourke who provided advice regarding this manuscript.  
122 **Competing interests:** Authors declare that NO conflicting interests exist.

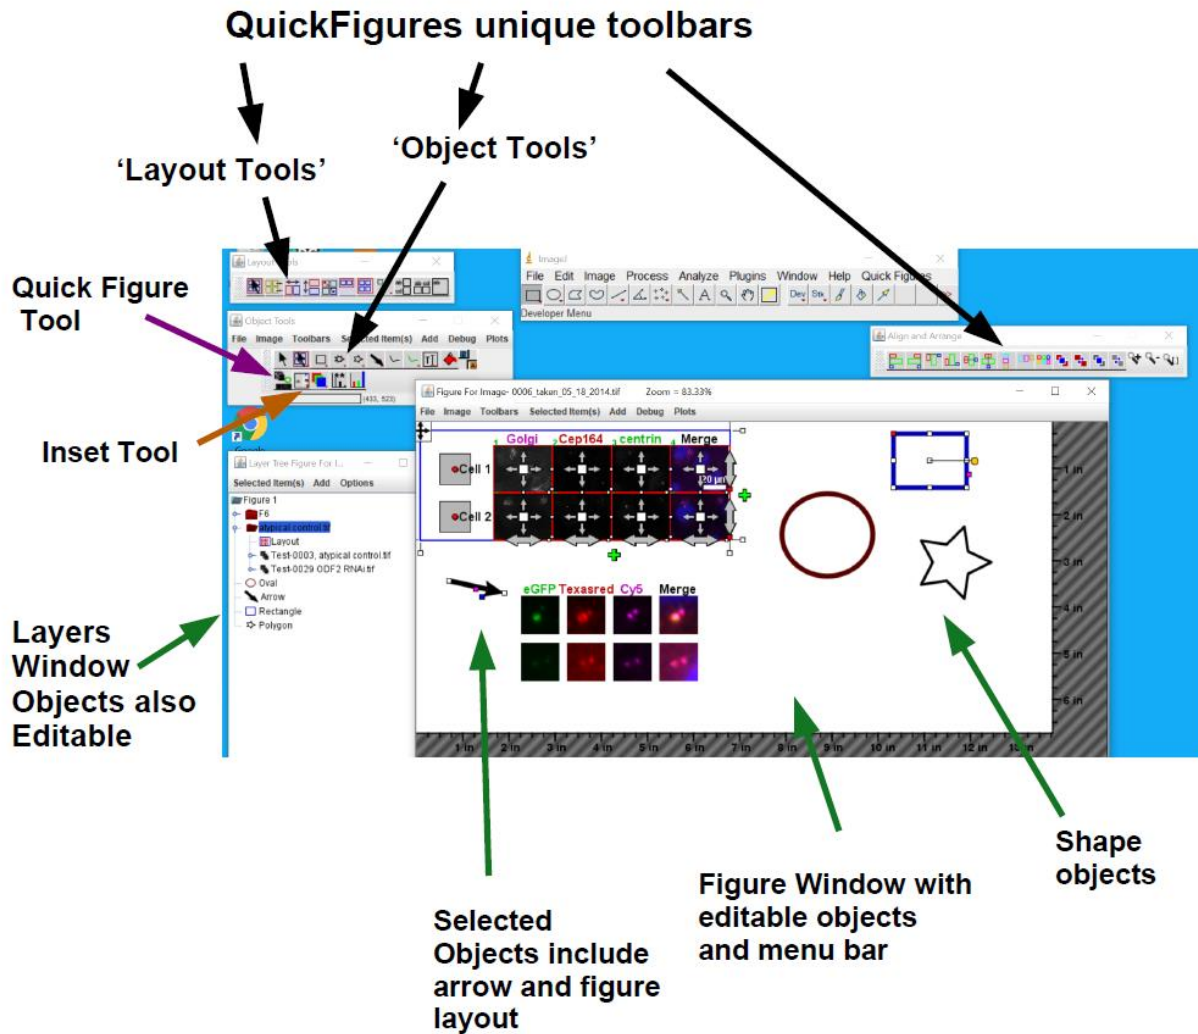

123 **Figure 1: Appearance of ImageJ with QuickFigures installed. Key features of QuickFigures user interface are shown including the Figure, Toolbars and Layers Window.**

124

125 **References:**

- 126 1. Mazo G, Soplop N, Wang WJ, Uryu K, Tsou MFB. Spatial Control of Primary  
127 Ciliogenesis by Subdistal Appendages Alters Sensation-Associated Properties of Cilia.  
128 Dev Cell [Internet]. 2016;39(4):424–37. Available from:  
129 <http://dx.doi.org/10.1016/j.devcel.2016.10.006>
- 130 2. Aigouy B, Mirouse V. ScientiFig: A tool to build publication-ready scientific figures. Nat  
131 Methods. 2013;10(11):1048.
- 132 3. Mutterer J, Zinck E. Quick-and-clean article figures with FigureJ. J Microsc. 2013 Jul  
133 26;252.
- 134 4. Linkert M, Rueden CT, Allan C, Burel JM, Moore W, Patterson A, et al. Metadata  
135 matters: Access to image data in the real world. J Cell Biol. 2010;189(5):777–82.

136

137
